# Supplementary material for: Comparison of the Mutation Profiles of Triple-Negative Breast Cancers and Hormone Receptor-Positive/Human Epidermal Growth Factor Receptor 2-Negative Breast Cancers at the T2N0-1M0 Stage
Source: Research Square preprint supplement (doi:10.21203/rs.3.rs-129609/v1), 2020-12-28
Supplement: Supplementary file 1 [file 80c932639c4ddaaada6ebd8a.docx]

**Comparison of the** [**Mutation Profiles of Triple-Negative Breast Cancers and Hormone Receptor-Positive/Human Epidermal Growth Factor Receptor 2-Negative Breast Cancers**](http://lmce.med1dev.net/html/?pmode=UserAddon&smode=ajax&fn=DownAbstWord&seq=874) **at the T2N0-1M0 Stage**

Seungju Lee1, Hyun Yul Kim1, Youn Joo Jung1, Hyun-June Paik1, Chang Shin Jung1, Jee Yeon Kim2, Sun Min Lee3, Seung Hwan Oh3,*

*1Department of Surgery, Pusan National University Yangsan Hospital, Pusan National University School Of Medicine, Yangsan, Korea; 2Department of Pathology, Pusan National University Yangsan Hospital, Pusan National University School of Medicine; 3Department of Laboratory Medicine, Pusan National University Yangsan Hospital, Pusan National University School Of Medicine, Yangsan, Korea*

*Correspondence to:

Seung Hwan Oh, MD,

Department of Laboratory Medicine, Pusan National University Yangsan Hospital, Yangsan-si, Gyeongsangnam-do 50612, South Korea; e-mail: paracelsus@pusan.ac.kr

Table S1. Significant sequence variations detected in this study.

| ***No*** | ***Disease group*** | ***No. of mutated genes*** | ***No. of mutations*** | ***Gene*** | ***Germline component*** | ***ACMG***  ***classification*** | ***VAF (%)*** | ***Read Depth*** | ***HGVS cDNA*** | ***HGVS protein*** | ***COSMIC*** |
| --- | --- | --- | --- | --- | --- | --- | --- | --- | --- | --- | --- |
| 1 | HR+HER2- | 1 | 1 | *TP53* |  | LP | 35.32 | 1325 | *NM_000546.5:c.517G>T* | NP_000537.3:p.Val173Leu | COSM11084 |
| 2 | HR+HER2- | 1 | 1 | *TP53* |  | P | 49.41 | 1878 | *NM_000546.5:c.814delG* | NP_000537.3:p.Val272CysfsTer73 | COSM10859 |
| 3 | HR+HER2- | 1 | 1 | *TP53* |  | P | 51.58 | 1644 | *NM_000546.5:c.1015G>T* | NP_000537.3:p.Glu339Ter | COSM11286 |
| 4 | HR+HER2- | 2 | 2 | *TP53* |  | P | 33.62 | 1859 | *NM_000546.5:c.646G>A* | NP_000537.3:p.Val216Met | COSM10667 |
|  |  |  |  | *BRAF* |  | VUS | 32.1 | 81 | *NM_004333.4:c.2128-16_2128-7del* |  |  |
| 5 | HR+HER2- | 3 | 3 | *TP53* |  | P | 61.77 | 1415 | *NM_000546.5:c.641A>G* | NP_000537.3:p.His214Arg | COSM1640840 |
|  |  |  |  | *BRCA2* | *germline* | P | 77.13 | 927 | *NM_000059.3:c.1674_1680del* | NP_000050.2:p.Ile558MetfsTer13 |  |
|  |  |  |  | *IDH2* |  | VUS | 43.04 | 2472 | *NM_002168.2:c.805A>T* | NP_002159.2:p.Ile269Phe |  |
| 6 | HR+HER2- | 1 | 1 | *PIK3CA* |  | LP | 53.62 | 1779 | *NM_006218.2:c.1349_1366del* | NP_006209.2:p.His450_Leu455del |  |
| 7 | HR+HER2- | 2 | 2 | *PIK3CA* |  | P | 14.1 | 2014 | *NM_006218.2:c.3140A>G* | NP_006209.2:p.His1047Arg | COSM249874 |
|  |  |  |  | *BRCA1* | *germline* | VUS | 52.04 | 2158 | *NM_007300.3:c.2225A>G* | NP_009231.2:p.Asn742Ser | COSM1740356 |
| 8 | HR+HER2- | 1 | 2 | *PIK3CA* |  | LP | 20.85 | 1727 | *NM_006218.2:c.1357G>A* | NP_006209.2:p.Glu453Lys | COSM1041484 |
|  |  |  |  | *PIK3CA* |  | P | 19.81 | 2256 | *NM_006218.2:c.3140A>G* | NP_006209.2:p.His1047Arg | COSM249874 |
| 9 | HR+HER2- | 2 | 2 | *PIK3CA* |  | P | 31.66 | 1197 | *NM_006218.2:c.1624G>A* | NP_006209.2:p.Glu542Lys | COSM125369 |
|  |  |  |  | *AR* |  | VUS | 46.9 | 145 | *NM_000044.3:c.1412_1420del* | NP_000035.2:p.Gly471_Gly473del | COSM5602821 |
| 10 | HR+HER2- | 2 | 2 | *PIK3CA* |  | P | 50.08 | 1164 | *NM_006218.2:c.1624G>A* | NP_006209.2:p.Glu542Lys | COSM125369 |
|  |  |  |  | *FGFR1* |  | VUS | 50.23 | 2823 | *NM_001174067.1:c.1402A>G* | NP_001167538.1:p.Met468Val |  |
| 11 | HR+HER2- | 2 | 2 | *PIK3CA* |  | LP | 18.88 | 964 | *NM_006218.2:c.1634A>G* | NP_006209.2:p.Glu545Gly | COSM12458 |
|  |  |  |  | *BRIP1* |  | VUS | 53.96 | 1188 | *NM_032043.2:c.2258A>G* | NP_114432.2:p.Asp753Gly |  |
| 12 | HR+HER2- | 2 | 2 | *PIK3CA* |  | P | 16.5 | 897 | *NM_006218.2:c.1633G>A* | NP_006209.2:p.Glu545Lys | COSM125370 |
|  |  |  |  | *BRCA2* | *germline* | VUS | 45.31 | 1567 | *NM_000059.3:c.9673T>C* | NP_000050.2:p.Tyr3225His |  |
| 13 | HR+HER2- | 3 | 4 | *PIK3CA* |  | P | 45.29 | 2296 | *NM_006218.2:c.3140A>G* | NP_006209.2:p.His1047Arg | COSM249874 |
|  |  |  |  | *PTEN* |  | P | 31.69 | 934 | *NM_000314.4:c.623_634+7del* |  | COSM921116 |
|  |  |  |  | *PTEN* |  | P | 33.68 | 861 | *NM_000314.4:c.617delT* | NP_000305.3:p.Phe206SerfsTer15 |  |
|  |  |  |  | *MET* |  | VUS | 76.6 | 1551 | *NM_001127500.1:c.3730G>A* | NP_001120972.1:p.Ala1244Thr |  |
| 14 | HR+HER2- | 1 | 1 | *ALK* |  | VUS | 15.43 | 551 | *NM_004304.4:c.2763C>G* | NP_004295.2:p.Phe921Leu | COSM5335304 |
| 15 | HR+HER2- | 1 | 1 | *NOTCH1* |  | VUS | 48 | 750 | *NM_017617.3:c.4184A>T* | NP_060087.3:p.Asn1395Ile |  |
| 16 | HR+HER2- | 1 | 1 | *PTEN* |  | P | 39.11 | 1634 | *NM_000314.4:c.163delA* | NP_000305.3:p.Arg55GlyfsTer44 |  |
| 17 | HR+HER2- | 1 | 1 | *AKT1* |  | P | 30.23 | 2699 | *NM_001014431.1:c.49G>A* | NP_001014431.1:p.Glu17Lys | COSM33765 |
| 18 | HR+HER2- | 1 | 1 | *PALB2* |  | VUS | 48.91 | 3827 | *NM_024675.3:c.2228A>G* | NP_078951.2:p.Tyr743Cys |  |
| 19 | HR+HER2- | 1 | 1 | *BRCA1* |  | P | 67.18 | 1420 | *NM_007300.3:c.4454_4469del* | NP_009231.2:p.Pro1485GlnfsTer36 |  |
| 20 | HR+HER2- | 2 | 2 | *BRCA2* |  | VUS | 46.98 | 1786 | *NM_000059.3:c.7722G>T* | NP_000050.2:p.Trp2574Cys |  |
|  |  |  |  | *ERBB2* |  | LP | 84.87 | 4963 | *NM_004448.2:c.2264T>C* | NP_004439.2:p.Leu755Ser | COSM14060 |
| 21 | HR+HER2- | 0 | 0 |  |  |  |  |  |  |  |  |
| 22 | HR+HER2- | 0 | 0 |  |  |  |  |  |  |  |  |
|  |  |  |  |  |  |  |  |  |  |  |  |
| 1 | TNBC | 1 | 1 | *TP53* |  | P | 18.12 | 2197 | *NM_000546.5:c.637C>T* | NP_000537.3:p.Arg213Ter | COSM10654 |
| 2 | TNBC | 2 | 2 | *TP53* |  | P | 44.59 | 2485 | *NM_000546.5:c.659A>G* | NP_000537.3:p.Tyr220Cys | COSM10758 |
|  |  |  |  | *PTEN* |  | P | 16.75 | 394 | *NM_000314.4:c.802-34_820del* |  |  |
| 3 | TNBC | 2 | 2 | *TP53* |  | LP | 86.58 | 1371 | *NM_000546.5:c.614A>G* | NP_000537.3:p.Tyr205Cys | COSM11351 |
|  |  |  |  | *BRCA1* | *germline +somatic* | P | 92.48 | 1943 | *NM_007300.3:c.3627dupA* | NP_009231.2:p.Glu1210ArgfsTer9 |  |
| 4 | TNBC | 2 | 2 | *TP53* |  | P | 17.49 | 1944 | *NM_000546.5:c.856G>A* | NP_000537.3:p.Glu286Lys | COSM10726 |
|  |  |  |  | *PIK3CA* |  | P | 30.53 | 2342 | *NM_006218.2:c.3140A>G* | NP_006209.2:p.His1047Arg | COSM249874 |
| 5 | TNBC | 2 | 2 | *TP53* |  | LP | 14.41 | 1846 | *NM_000546.5:c.613T>G* | NP_000537.3:p.Tyr205Asp | COSM1159830 |
|  |  |  |  | *BARD1* | *germline* | VUS | 56.88 | 1264 | *NM_000465.2:c.1820T>A* | NP_000456.2:p.Val607Asp |  |
| 6 | TNBC | 2 | 2 | *TP53* |  | P | 51.8 | 1552 | *NM_000546.5:c.488A>G* | NP_000537.3:p.Tyr163Cys | COSM10808 |
|  |  |  |  | *KIT* |  | P | 23.63 | 1773 | *NM_000222.2:c.1780delA* | NP_000213.1:p.Thr594ProfsTer18 |  |
| 7 | TNBC | 2 | 2 | *TP53* |  | P | 60.43 | 2123 | *NM_000546.5:c.584T>A* | NP_000537.3:p.Ile195Asn | COSM11089 |
|  |  |  |  | *STK11* |  | P | 38.48 | 369 | *NM_000455.4:c.734+2T>A* |  |  |
| 8 | TNBC | 4 | 4 | *TP53* |  | P | 75.21 | 1202 | *NM_000546.5:c.1024C>T* | NP_000537.3:p.Arg342Ter | COSM11073 |
|  |  |  |  | *BRCA1* |  | VUS | 82.42 | 2127 | *NM_007300.3:c.3535A>G* | NP_009231.2:p.Lys1179Glu |  |
|  |  |  |  | *BRIP1* |  | VUS | 90.92 | 1311 | *NM_032043.2:c.1340A>G* | NP_114432.2:p.Asn447Ser |  |
|  |  |  |  | *PALB2* |  | VUS | 79.1 | 3546 | *NM_024675.3:c.2228A>G* | NP_078951.2:p.Tyr743Cys |  |
| 9 | TNBC | 5 | 6 | *TP53* |  | LP | 29.25 | 2978 | *NM_000546.5:c.820_822del* | NP_000537.3:p.Val274del | COSM45491 |
|  |  |  |  | *KIT* |  | LP | 15.42 | 2990 | *NM_000222.2:c.1255G>C* | NP_000213.1:p.Asp419His | COSM1152 |
|  |  |  |  | *AR* |  | LP | 17.41 | 2596 | *NM_000044.3:c.884T>C* | NP_000035.2:p.Leu295Pro |  |
|  |  |  |  | *AR* |  | VUS | 17.7 | 2497 | *NM_000044.3:c.873A>C* | NP_000035.2:p.Lys291Asn |  |
|  |  |  |  | *RET* |  | VUS | 15.68 | 899 | *NM_020975.4:c.319G>C* | NP_066124.1:p.Glu107Gln | COSM5592846 |
|  |  |  |  | *MET* |  | VUS | 48.6 | 1862 | *NM_001127500.1:c.1898A>T* | NP_001120972.1:p.His633Leu |  |
| 10 | TNBC | 2 | 2 | *PALB2* |  | VUS | 53.17 | 2727 | *NM_024675.3:c.2228A>G* | NP_078951.2:p.Tyr743Cys |  |
|  |  |  |  | *CD274* |  | VUS | 52.54 | 2514 | *NM_014143.3:c.309T>A* | NP_054862.1:p.Asp103Glu |  |
| 11 | TNBC | 1 | 1 | *AR* |  | VUS | 47.91 | 2317 | *NM_000044.3:c.1062C>A* | NP_000035.2:p.Asp354Glu | COSM3094371 |
| 12 | TNBC | 0 | 0 |  |  |  |  |  |  |  |  |

Abbreviations: ACMG, the American College of Medical Genetics and Genomics; VAF, variant allele frequencies; HGVS, the Human Genome Variation Society; COSMIC, the Catalogue of Somatic Mutations in Cancer; P, pathogenic; LP, likely pathogenic, VUS, variation of uncertain significance
